# Supplementary material
Source: publisher site journal article supplement (https://www.dovepress.com/article/551536)
Supplement: Supplementary file 1 [file 551536%20Revised%20appendix.docx]

# **APPENDIX to** **"Alcohol Cues Elicit Differences in Brain Activation Patterns of Abstinent Men and Women with Alcohol Use Disorders" by Kayle S. Sawyer, Marlene Oscar-Berman, Susan Mosher Ruiz, Ksenija Marinkovic, Mary M. Valmas, and Gordon J. Harris**

#### **FIGURE A1**

Group and gender comparisons in percent correct responses to the probe face. A significant Group-by-Gender interaction showed that face memory accuracy was significantly higher for the Alcoholic Women than the Alcoholic Men, a gender difference that was greater than the one observed for the NC group. Alcoholic Women also had higher accuracy than Control Women. (Also see Table A2.) There was no significant effect of Distractor type on performance accuracy. Error bars represent standard error of the mean. Abbreviations: ALCm = Alcoholic men; ALCw = Alcoholic women; NCm = Nonalcoholic men; NCw = Nonalcoholic women.

#### **FIGURE A2**

Face memory reaction times: group and gender comparisons in reaction times to the probe face as a function of the distractor stimuli. Reaction times (in milliseconds) are shown for correct trials sorted by conditions and groups. (Also see Table A3.) Participants did not vary significantly by Group or Gender on overall reaction times. There was no significant effect of Distractor type on reaction time, nor did reaction time performance by Distractor type significantly vary by Group or Gender. Error bars represent standard error of the mean. Abbreviations: ALCm = Alcoholic men; ALCw = Alcoholic women; NCm = Nonalcoholic men; NCw = Nonalcoholic women.

#### **FIGURE A3**

Cortical activation maps for the alcbev vs. scrambled contrast within fixation-regions (left lateral view). A significant Group-by-Gender interaction revealed several clusters (see Figure 3 and Table A5), although no clusters with significant interactions were found on the left lateral surface. Group mean contrast values (for alcbev vs. scrambled within fixation-regions) are displayed in the four brain images located in the corners of the figure, and group comparisons are indicated by minus signs. Abbreviations: ALCm = Alcoholic men; ALCw = Alcoholic women; NCm = Nonalcoholic men; NCw = Nonalcoholic women.

#### **FIGURE A4**

Cortical activation maps for the alcbev vs. scrambled contrast within task-regions (left lateral view). A significant Group-by-Gender interaction revealed several clusters (see Figure 4 and Table A5), although none are visible on the left lateral view. Group mean contrast values (for alcbev vs. scrambled within fixation-regions) are displayed in the four brain images located in the corners of the figure, and group comparisons are indicated by minus signs. Abbreviations: ALCm = Alcoholic men; ALCw = Alcoholic women; NCm = Nonalcoholic men; NCw = Nonalcoholic women.

#### **TABLE A1. Literature supporting a priori regions of interest**

| **Region** | **Index** | **Citations** | **Putative Functions** |
| --- | --- | --- | --- |
| Dorsolateral Prefrontal Cortex (DLPFC) | 15, 16, 53, 54 | George et al, 2001[56](https://paperpile.com/c/jPzyAa/I1JH); Goldstein & Volkow, 2011[54](https://paperpile.com/c/jPzyAa/xv1p); Wrase et al, 2002[61](https://paperpile.com/c/jPzyAa/FxYV); Tapert et al, 2003[62](https://paperpile.com/c/jPzyAa/UI6E); Schacht et al, 2013[4](https://paperpile.com/c/jPzyAa/6vMr); Heinz et al, 2007[57](https://paperpile.com/c/jPzyAa/5awA); Ray et al, 2010-1[58](https://paperpile.com/c/jPzyAa/1mvr); Ray et al, 2010-2[129](https://paperpile.com/c/jPzyAa/R41y); Alba-Ferrara et al, 2016[55](https://paperpile.com/c/jPzyAa/7l0T) | cue exposure, distractor interference, craving, reward processing, salience, working memory, emotional faces |
| Ventrolateral Prefrontal Cortex (VLPFC) | 12, 14, 52 | Goldstein & Volkow, 2011[54](https://paperpile.com/c/jPzyAa/xv1p); Alba-Ferrara et al, 2016[55](https://paperpile.com/c/jPzyAa/7l0T) | cue exposure, distractor interference, reward processing, salience,emotional faces |
| Orbitofrontal  Cortex (OFC) | 24, 62, 63, 64 | George et al, 2001[56](https://paperpile.com/c/jPzyAa/I1JH); Goldstein & Volkow, 2011[54](https://paperpile.com/c/jPzyAa/xv1p); Myrick et al, 2004[60](https://paperpile.com/c/jPzyAa/WN7Z); Wrase et al, 2002[61](https://paperpile.com/c/jPzyAa/FxYV); Schacht et al, 2013[4](https://paperpile.com/c/jPzyAa/6vMr); Tapert et al, 2003[62](https://paperpile.com/c/jPzyAa/UI6E); Ray et al, 2010-1[58](https://paperpile.com/c/jPzyAa/1mvr); Ray et al, 2010-2[129](https://paperpile.com/c/jPzyAa/R41y); Alba-Ferrara et al, 2016[55](https://paperpile.com/c/jPzyAa/7l0T) | cue exposure, distractor interference, craving, reward processing, salience, working memory, emotional faces |
| Anterior Cingulate Cortex (ACC) | 6, 7, 8, 9, 10, 46 | Goldstein & Volkow, 2011[54](https://paperpile.com/c/jPzyAa/xv1p); Myrick et al, 2004[60](https://paperpile.com/c/jPzyAa/WN7Z); Wrase et al, 2002[61](https://paperpile.com/c/jPzyAa/FxYV); Tapert et al, 2003[62](https://paperpile.com/c/jPzyAa/UI6E); Schacht et al, 2013[4](https://paperpile.com/c/jPzyAa/6vMr); Ray et al, 2010-1[58](https://paperpile.com/c/jPzyAa/1mvr); Heinz et al, 2007[57](https://paperpile.com/c/jPzyAa/5awA); Alba-Ferrara et al, 2016[55](https://paperpile.com/c/jPzyAa/7l0T) | cue exposure, distractor interference, craving, reward processing, salience, working memory, emotional faces |
| Insular Cortex | 17, 18, 47, 48, 49 | Myrick et al, 2004[60](https://paperpile.com/c/jPzyAa/WN7Z); Ray et al, 2010-1[58](https://paperpile.com/c/jPzyAa/1mvr); Ray et al, 2010-2[129](https://paperpile.com/c/jPzyAa/R41y); Heinz et al, 2007[57](https://paperpile.com/c/jPzyAa/5awA); Schacht et al, 2013[4](https://paperpile.com/c/jPzyAa/6vMr); Alba-Ferrara et al, 2016[55](https://paperpile.com/c/jPzyAa/7l0T) | cue exposure, distractor interference, salience, emotional faces |
| ParahippocampalGyrus | 23 | Tapert et al, 2003[62](https://paperpile.com/c/jPzyAa/UI6E); Ray et al, 2010-1[58](https://paperpile.com/c/jPzyAa/1mvr); Schacht et al, 2013[4](https://paperpile.com/c/jPzyAa/6vMr), Alba-Ferrara et al, 2016[55](https://paperpile.com/c/jPzyAa/7l0T) | cue exposure, salience, emotional faces |
| Hippocampus | *17, 53* | Myrick et al, 2004[60](https://paperpile.com/c/jPzyAa/WN7Z); Ray et al, 2010-1[58](https://paperpile.com/c/jPzyAa/1mvr); Alba-Ferrara et al, 2016[55](https://paperpile.com/c/jPzyAa/7l0T) | cue exposure, salience, emotional faces |
| Amygdala | *18, 54* | Tapert et al, 2003[62](https://paperpile.com/c/jPzyAa/UI6E); Ray et al, 2010-1[58](https://paperpile.com/c/jPzyAa/1mvr); Schacht et al, 2013[4](https://paperpile.com/c/jPzyAa/6vMr) | cue exposure, salience |
| Fusiform | 21 | Wrase et al, 2002[61](https://paperpile.com/c/jPzyAa/FxYV); Tapert et al, 2003[62](https://paperpile.com/c/jPzyAa/UI6E); Schacht et al, 2013[4](https://paperpile.com/c/jPzyAa/6vMr); Ray et al, 2010-2[129](https://paperpile.com/c/jPzyAa/R41y); Heinz et al, 2007[57](https://paperpile.com/c/jPzyAa/5awA); Alba-Ferrara et al, 2016[55](https://paperpile.com/c/jPzyAa/7l0T) | cue exposure, distractor interference, craving, salience, emotional faces |
| Extended Reward & Oversight System (EROS) | 15, 16, 53, 54, 17, 18, 47, 48, 49, 32, 24, 62, 63, 64, 6 7, 8, 9, 10, 46, 23, 43; *17, 18, 26, 28, 53, 54, 58, 60* | Makris et al, 2008[63](https://paperpile.com/c/jPzyAa/XPkq) | cue exposure, craving, reward processing, working memory |

Ten a priori regions of interest (ROI) were selected, based upon supporting literature. Regions are listed, with index numbers from Destrieux et al (2010), used in this manuscript to reproduce the region. Italicized numbers in the index column refer to FreeSurfer segmentation label numbers from the Desikan-Killiany (2006). The Extended Reward and Oversight System (EROS; Makris et al, 2008) is a composite ROI that includes the regions listed above EROS. The associated functions listed were inconsistent in use of the terminology, and we used our judgment in selecting the appropriate function based upon the context of the individual citations, such that the literature cited supported the putative functions for these regions that include cue exposure, distractor interference, craving, reward processing, salience, working memory, or emotional faces, with some overlapping functions. Absence of a given function listed does not suggest that the region is not involved in the missing function (*eg*, the amygdala obviously is involved in emotional face processing, but the individual citations listed did not provide such evidence).

#### **TABLE A2. Behavioral task percent correct responses**

| **Percent Correct Responses Overallabc** | | | | | | |
| --- | --- | --- | --- | --- | --- | --- |
|  | ALC | ALCw | ALCm | NC | NCw | NCm |
|  | n = 42 | n = 42 | n = 21 | n = 42 | n = 21 | n = 21 |
| Mean | 81.4 | 85.3 | 77.4 | 81.0 | 79.0 | 82.9 |
| Standard Deviation | 11.5 | 6.8 | 13.8 | 9.7 | 10.7 | 8.4 |
| Range | 50.0-97.5 | 66.0-96.3 | 50.0-97.5 | 54.9-96.9 | 54.9-92.6 | 71.0-96.9 |
| **Percent Correct Responses by Distractor** | | | | | | |
|  | ALC | ALCw | ALCm | NC | NCw | NCm |
| Alcoholic Beverages |  | | | | | |
| Mean | 81.4 | 85.3 | 77.5 | 81.4 | 79.1 | 83.7 |
| Standard Deviation | 12.4 | 7.4 | 15.0 | 11.4 | 12.9 | 9.5 |
| Range | 45.8-98.1 | 66.7-96.3 | 45.8-98.1 | 51.9-98.1 | 51.9-98.1 | 64.8-98.1 |
| Nonalcoholic Beverages |  | | | | | |
| Mean | 82.1 | 85.3 | 78.9 | 81.1 | 80.5 | 81.8 |
| Standard Deviation | 10.8 | 7.7 | 12.5 | 9.0 | 9.2 | 9.0 |
| Range | 53.7-98.1 | 68.8-98.1 | 53.7-96.3 | 57.4-94.4 | 57.4-91.7 | 64.8-94.4 |
| Scrambled Pictures |  | | | | | |
| Mean | 80.6 | 85.3 | 75.9 | 80.4 | 77.5 | 83.2 |
| Standard Deviation | 13.6 | 8.6 | 16.1 | 11.1 | 12.1 | 9.4 |
| Range | 44.4-98.1 | 62.5-98.1 | 44.4-98.1 | 51.9-98.1 | 51.9-91.7 | 61.1-98.1 |
| **Percent Correct Responses by Facial Emotiondef** | | | | | | |
|  | ALC | ALCw | ALCm | NC | NCw | NCm |
| Positive Faces |  | | | | | |
| Mean | 82.4 | 86.8 | 78.1 | 80.7 | 79.4 | 82.0 |
| Standard Deviation | 12.5 | 9.0 | 14.2 | 10.4 | 11.9 | 8.7 |
| Range | 51.9-100.0 | 56.3-100.0 | 51.9-96.3 | 51.9-96.3 | 51.9-94.4 | 70.4-96.3 |
| Negative Faces |  | | | | | |
| Mean | 81.9 | 85.9 | 77.8 | 82.9 | 80.9 | 84.9 |
| Standard Deviation | 12.0 | 7.2 | 14.4 | 9.5 | 11.0 | 7.5 |
| Range | 46.3-98.1 | 68.8-98.1 | 46.3-98.1 | 53.7-98.1 | 53.7-94.4 | 72.2-98.1 |
| Neutral Faces |  | | | | | |
| Mean | 79.8 | 83.2 | 76.4 | 79.3 | 76.7 | 81.9 |
| Standard Deviation | 11.8 | 7.5 | 14.3 | 11.2 | 11.1 | 10.9 |
| Range | 51.9-98.1 | 62.5-92.6 | 51.9-98.1 | 50.0-96.3 | 50.0-92.6 | 63.0-96.3 |

Scores for accuracy are provided for overall performance, distractor type, and facial emotion. aGroup x Gender; bAlcoholic Women > Alcoholic Men; cAlcoholic Women > Control Women; dEmotion main effect; ePositive Faces > Neutral Faces; fNegative Faces > Neutral Faces; all *p* < 0.5. Abbreviations: ALCw = Alcoholic Women; ALCm = Alcoholic Men; NCw = Nonalcoholic Control Women; NCm = Nonalcoholic Control Men.

#### **TABLE A3. Behavioral task reaction times**

| **Reaction Times Overall** | | | | | | | |
| --- | --- | --- | --- | --- | --- | --- | --- |
|  |  | ALC | ALCw | ALCm | NC | NCw | NCm | |
|  |  | n = 42 | n = 21 | n = 21 | n = 42 | n = 21 | n = 21 | |
| All Trials (ms) |  |  |  |  |  |  |  | |
| Mean |  | 1374.0 | 1263.4 | 1484.6 | 1302.9 | 1319.3 | 1286.5 | |
| Standard Deviation |  | 418.2 | 213.0 | 536.1 | 300.0 | 337.2 | 265.0 | |
| Range |  | 896.6 - 2720.8 | 896.6 - 1699.5 | 922.8 - 2720.8 | 799.6 - 2164.9 | 931.2 - 2164.9 | 799.6 - 1812.7 | |
| Correct Trials (ms) |  |  |  |  |  |  |  | |
| Mean |  | 1317.6 | 1229.4 | 1405.9 | 1254.9 | 1263.1 | 1246.7 | |
| Standard Deviation |  | 377.0 | 207.9 | 481.5 | 288.1 | 321.1 | 258.7 | |
| Range |  | 889.7 - 2454.1 | 889.7 - 1649.3 | 912.4 - 2454.1 | 784.2 - 2129.2 | 909.0 - 2129.2 | 784.2 - 1795.1 | |
| Incorrect Trials (ms) |  |  |  |  |  |  |  | |
| Mean |  | 1686.2 | 1532.4 | 1840.0 | 1564.2 | 1591.0 | 1537.5 | |
| Standard Deviation |  | 538.2 | 285.2 | 680.3 | 328.2 | 376.8 | 278.1 | |
| Range |  | 1079.8 - 3883.9 | 1160.8 - 2374.8 | 1079.8 - 3883.9 | 1064.2 - 2480.1 | 1064.2 - 2480.1 | 1097.1 - 1939.1 | |
| **Reaction Times by Distractor** | | | | | | | |
|  |  | ALC | ALCw | ALCm | NC | NCw | NCm | |
| Alcoholic Beverages (ms) |  |  |  |  |  |  |  | |
| Mean |  | 1318.3 | 1235.4 | 1401.1 | 1252.2 | 1261.7 | 1242.7 | |
| Standard Deviation |  | 360.9 | 216.4 | 453.6 | 292.1 | 320.2 | 268.6 | |
| Range |  | 866.2 - 2367.9 | 866.2 - 1578.8 | 926.1 - 2367.9 | 765.7 - 2101.9 | 906.8 - 2101.9 | 765.7 - 1837.5 | |
| Nonalcoholic Beverages (ms) |  |  |  |  |  |  |  | |
| Mean |  | 1312.4 | 1215.5 | 1409.3 | 1257.5 | 1270.6 | 1244.5 | |
| Standard Deviation |  | 419.1 | 208.2 | 545.0 | 304.9 | 346.9 | 264.4 | |
| Range |  | 886.8 - 2682.0 | 886.8 - 1686.6 | 902.8 - 2682.0 | 779.7 - 2274.0 | 910.8 - 2274.0 | 779.7 - 1894.5 | |
| Scrambled Pictures (ms) |  |  |  |  |  |  |  | |
| Mean |  | 1324.2 | 1235.7 | 1412.7 | 1255.9 | 1255.8 | 1256.0 | |
| Standard Deviation |  | 378.8 | 213.1 | 482.0 | 281.8 | 306.5 | 262.5 | |
| Range |  | 888.7 - 2678.9 | 914.9 - 1686.1 | 888.7 - 2678.9 | 806.6 - 2004.1 | 882.4 - 2004.1 | 806.6 - 1825.8 | |
| **Reaction Times by Facial Emotion** | | | | | | | |
|  |  | ALC | ALCw | ALCm | NC | NCw | NCm | |
| Positive Faces (ms) |  |  |  |  |  |  |  | |
| Mean |  | 1290.5 | 1227.9 | 1353.1 | 1241.2 | 1238.4 | 1244.0 | |
| Standard Deviation |  | 347.2 | 229.3 | 431.6 | 279.5 | 306.7 | 257.0 | |
| Range |  | 867.7 - 2608.6 | 867.7 - 1617.1 | 894.3 - 2608.6 | 789.2 - 2015.1 | 870.0 - 2015.1 | 789.2 - 1871.9 | |
| Negative Faces (ms) |  |  |  |  |  |  |  | |
| Mean |  | 1303.9 | 1225.7 | 1382.0 | 1251.2 | 1264.3 | 1238.0 | |
| Standard Deviation |  | 322.5 | 186.2 | 407.2 | 294.0 | 323.2 | 269.1 | |
| Range |  | 900.0 - 2218.6 | 900.0 - 1674.6 | 918.8 - 2218.6 | 778.9 - 2128.5 | 889.4 - 2128.5 | 778.9 - 1803.4 | |
| Neutral Faces (ms) |  |  |  |  |  |  |  | |
| Mean |  | 1356.4 | 1233.6 | 1479.2 | 1272.4 | 1286.8 | 1258.0 | |
| Standard Deviation |  | 492.4 | 235.3 | 640.3 | 307.0 | 346.8 | 269.4 | |
| Range |  | 857.7 - 3051.0 | 857.7 - 1724.7 | 887.4 - 3051.0 | 784.4 - 2226.0 | 875.3 - 2226.0 | 784.4 - 1706.6 | |

Group reaction times in milliseconds are provided for distractor type, facial emotion, and face gender. No significant (*p* < 0.05) effects were identified for Group, Gender, Distractor, or Emotion, nor were significant interactions among those factors identified. Abbreviations: ALCw = Alcoholic Women; ALCm = Alcoholic Men; NCw = Nonalcoholic Control Women; NCm = Nonalcoholic Control Men.

#### **TABLE A4. Cortical cluster characteristics for significant contrasts within each group**

| Group | Fixation Masking | Contrast | Annotation | Hemi | Max | VtxMax | Size (mm^2) | MNIX | MNIY | MNIZ | CWP | CWPLow | CWPHi | NVtxs |
| --- | --- | --- | --- | --- | --- | --- | --- | --- | --- | --- | --- | --- | --- | --- |
| ALCw | fixation-regions | alcbev > nonalcbev | inferiorparietal | L | 5.777 | 78109 | 894.36 | -46.9 | -56.2 | 24.6 | 0.0003 | 0 | 0.0006 | 1808 |
| ALCw | fixation-regions | alcbev > nonalcbev | superiorfrontal | L | 5.198 | 117174 | 2021.3 | -7.3 | 50.7 | 20.6 | 0.0003 | 0 | 0.0006 | 3312 |
| ALCw | fixation-regions | alcbev > nonalcbev | precuneus | L | 4.279 | 104685 | 1114.58 | -6.4 | -64 | 36.3 | 0.0003 | 0 | 0.0006 | 2313 |
| ALCw | fixation-regions | alcbev > nonalcbev | middletemporal | L | 3.397 | 132409 | 372.86 | -57.9 | -28.2 | -12.3 | 0.0006 | 0 | 0.0012 | 643 |
| ALCw | fixation-regions | alcbev > nonalcbev | precuneus | R | 5.031 | 78184 | 343.04 | 8.9 | -53.5 | 21.9 | 0.0006 | 0 | 0.0012 | 905 |
| ALCw | fixation-regions | alcbev > nonalcbev | superiorfrontal | R | 3.007 | 33332 | 470.55 | 7.4 | 44.5 | 26.4 | 0.0003 | 0 | 0.0006 | 773 |
| ALCw | fixation-regions | alcbev > nonalcbev | middletemporal | R | 2.388 | 149193 | 390.07 | 57.3 | -28.2 | -12.1 | 0.0003 | 0 | 0.0006 | 583 |
| NCm | fixation-regions | alcbev > nonalcbev | precuneus | L | 2.001 | 28044 | 372.78 | -5.8 | -61.1 | 26 | 0.0003 | 0 | 0.0006 | 722 |
| NCm | fixation-regions | alcbev > nonalcbev | inferiorparietal | R | 2.093 | 87534 | 353.25 | 48 | -63.2 | 30.4 | 0.0003 | 0 | 0.0006 | 646 |
| NCw | fixation-regions | alcbev > nonalcbev | rostralanteriorcingulate | L | 3.853 | 72938 | 1014.62 | -5.7 | 40.1 | -1 | 0.0003 | 0 | 0.0006 | 1732 |
| NCw | fixation-regions | alcbev > nonalcbev | precuneus | L | 3.518 | 88451 | 552.66 | -6.9 | -55 | 16.2 | 0.0003 | 0 | 0.0006 | 1155 |
| NCw | fixation-regions | alcbev > nonalcbev | superiorfrontal | L | 3.043 | 106164 | 573.38 | -7.2 | 53.9 | 28.3 | 0.0003 | 0 | 0.0006 | 853 |
| NCw | fixation-regions | alcbev > nonalcbev | superiorfrontal | L | 2.719 | 37125 | 231.3 | -13.6 | 43.2 | 41.7 | 0.01344 | 0.01106 | 0.01611 | 411 |
| NCw | fixation-regions | alcbev > nonalcbev | superiorfrontal | R | 3.812 | 154767 | 425.34 | 11.2 | 50.9 | 9.2 | 0.0003 | 0 | 0.0006 | 716 |
| NCw | fixation-regions | alcbev > nonalcbev | superiorfrontal | R | 2.997 | 141183 | 288 | 9.1 | 53.1 | 23.9 | 0.0006 | 0 | 0.0012 | 467 |
| NCw | fixation-regions | alcbev > nonalcbev | precuneus | R | 2.381 | 20851 | 168.89 | 12.5 | -44.6 | 37.9 | 0.03762 | 0.03352 | 0.04171 | 460 |
| ALCm | fixation-regions | alcbev > scrambled | superiortemporal | L | 3.628 | 127514 | 287.34 | -52.7 | -19 | -6 | 0.02056 | 0.0176 | 0.02381 | 534 |
| ALCm | fixation-regions | alcbev > scrambled | inferiorparietal | L | 3.532 | 77987 | 597.66 | -39.4 | -65.2 | 28.3 | 0.0003 | 0 | 0.0006 | 1239 |
| ALCm | fixation-regions | alcbev > scrambled | precuneus | L | 3.011 | 42213 | 1099.78 | -4.6 | -65.4 | 30.8 | 0.0003 | 0 | 0.0006 | 2316 |
| ALCm | fixation-regions | alcbev > scrambled | temporalpole | R | 3.202 | 75073 | 255.04 | 36.1 | 15.1 | -37.4 | 0.00389 | 0.0027 | 0.00539 | 399 |
| ALCm | fixation-regions | alcbev > scrambled | middletemporal | R | 2.184 | 32116 | 246.83 | 55.8 | -14 | -19.7 | 0.00479 | 0.0033 | 0.00629 | 358 |
| ALCw | fixation-regions | alcbev > scrambled | superiorfrontal | L | 6.192 | 119696 | 1479.43 | -9 | 45 | 32.5 | 0.0003 | 0 | 0.0006 | 2382 |
| ALCw | fixation-regions | alcbev > scrambled | isthmuscingulate | L | 4.52 | 21771 | 1599.1 | -4.6 | -46.8 | 28.5 | 0.0003 | 0 | 0.0006 | 3485 |
| ALCw | fixation-regions | alcbev > scrambled | inferiorparietal | L | 3.772 | 8342 | 1007.44 | -46.3 | -55.6 | 24.1 | 0.0003 | 0 | 0.0006 | 1999 |
| ALCw | fixation-regions | alcbev > scrambled | medialorbitofrontal | L | 3.625 | 141106 | 792.29 | -10.2 | 46.2 | -9.5 | 0.0003 | 0 | 0.0006 | 1321 |
| ALCw | fixation-regions | alcbev > scrambled | middletemporal | L | 3.4 | 132407 | 461.02 | -57.4 | -28.8 | -12.1 | 0.0006 | 0 | 0.0012 | 831 |
| ALCw | fixation-regions | alcbev > scrambled | precuneus | R | 4.528 | 147039 | 407.44 | 6 | -56.9 | 22.3 | 0.0003 | 0 | 0.0006 | 1063 |
| ALCw | fixation-regions | alcbev > scrambled | rostralmiddlefrontal | R | 2.928 | 77385 | 752.89 | 18.2 | 52.8 | 24.8 | 0.0003 | 0 | 0.0006 | 1197 |
| ALCw | fixation-regions | alcbev > scrambled | superiorfrontal | R | 2.644 | 116693 | 213.6 | 7.6 | 40.8 | 48.1 | 0.01937 | 0.01641 | 0.02233 | 351 |
| NCm | fixation-regions | alcbev > scrambled | isthmuscingulate | L | 4.044 | 159377 | 1127.18 | -7.7 | -52 | 21.5 | 0.0003 | 0 | 0.0006 | 2355 |
| NCm | fixation-regions | alcbev > scrambled | middletemporal | L | 3.081 | 46308 | 253.13 | -57.3 | -4.8 | -25.2 | 0.02056 | 0.0176 | 0.02381 | 442 |
| NCm | fixation-regions | alcbev > scrambled | medialorbitofrontal | L | 2.523 | 119804 | 386.08 | -7.7 | 57.4 | -7.9 | 0.0006 | 0 | 0.0012 | 508 |
| NCm | fixation-regions | alcbev > scrambled | superiorfrontal | L | 2.157 | 34872 | 247.83 | -9.7 | 53.4 | 17 | 0.0241 | 0.02085 | 0.02764 | 349 |
| NCm | fixation-regions | alcbev > scrambled | inferiorparietal | L | 2.069 | 117757 | 286.31 | -34.4 | -81.3 | 30 | 0.00987 | 0.00778 | 0.01195 | 501 |
| NCm | fixation-regions | alcbev > scrambled | inferiorparietal | R | 3.908 | 130241 | 606.24 | 46.4 | -53.3 | 29.1 | 0.0003 | 0 | 0.0006 | 1136 |
| NCm | fixation-regions | alcbev > scrambled | superiorfrontal | R | 3.772 | 154660 | 398.31 | 9.2 | 56.8 | 18 | 0.0006 | 0 | 0.0012 | 677 |
| NCm | fixation-regions | alcbev > scrambled | isthmuscingulate | R | 2.376 | 85932 | 344.91 | 6.8 | -49.7 | 13.4 | 0.0024 | 0.0015 | 0.0036 | 887 |
| NCm | fixation-regions | alcbev > scrambled | superiorfrontal | R | 2.322 | 18118 | 261.88 | 16.4 | 54.6 | 19.9 | 0.01165 | 0.00927 | 0.01403 | 332 |
| NCw | fixation-regions | alcbev > scrambled | superiorfrontal | L | 3.775 | 145688 | 785.15 | -9.1 | 60.9 | 21 | 0.0003 | 0 | 0.0006 | 1299 |
| NCw | fixation-regions | alcbev > scrambled | medialorbitofrontal | L | 3.35 | 98461 | 869.42 | -9.6 | 51.2 | -4.8 | 0.0003 | 0 | 0.0006 | 1367 |
| NCw | fixation-regions | alcbev > scrambled | middletemporal | L | 2.379 | 13182 | 203.24 | -51.4 | -12.3 | -20.5 | 0.04171 | 0.03733 | 0.04607 | 350 |
| ALCm | fixation-regions | nonalcbev > scrambled | superiortemporal | L | 3.138 | 161045 | 299.84 | -48.8 | -10.7 | -17.9 | 0.01225 | 0.00987 | 0.01463 | 585 |
| ALCw | fixation-regions | nonalcbev > scrambled | rostralmiddlefrontal | L | 3.585 | 82490 | 424.57 | -18.9 | 43.9 | 33.7 | 0.0003 | 0 | 0.0006 | 719 |
| ALCw | fixation-regions | nonalcbev > scrambled | superiorfrontal | R | 2.628 | 35019 | 244.79 | 14.4 | 53.7 | 26.1 | 0.00867 | 0.00659 | 0.01076 | 393 |
| NCm | fixation-regions | nonalcbev > scrambled | superiorfrontal | R | 3.123 | 149679 | 531.99 | 10.9 | 44.1 | 42.5 | 0.0003 | 0 | 0.0006 | 861 |
| NCm | fixation-regions | nonalcbev > scrambled | caudalmiddlefrontal | R | 2.592 | 63876 | 228.53 | 32 | 25.7 | 44.4 | 0.03762 | 0.03352 | 0.04171 | 420 |
| ALCm | task-regions | alcbev > nonalcbev | precuneus | L | 3.84 | 30022 | 820.45 | -9.8 | -74.1 | 42.2 | 0.0003 | 0 | 0.0006 | 1681 |
| ALCm | task-regions | alcbev > nonalcbev | inferiorparietal | L | 3.068 | 156958 | 724.95 | -46.8 | -63.5 | 10.3 | 0.0009 | 0.0003 | 0.0015 | 1254 |
| ALCm | task-regions | alcbev > nonalcbev | lateraloccipital | R | 2.796 | 46455 | 556.39 | 41.8 | -68.3 | -4.7 | 0.0176 | 0.01463 | 0.02056 | 770 |
| ALCw | task-regions | alcbev > nonalcbev | fusiform | L | 4.553 | 127987 | 3039.55 | -41.4 | -52.4 | -18.5 | 0.0003 | 0 | 0.0006 | 5083 |
| ALCw | task-regions | alcbev > nonalcbev | lateralorbitofrontal | L | 3.917 | 9114 | 696 | -32.3 | 25 | -18.9 | 0.00509 | 0.0036 | 0.00659 | 1456 |
| ALCw | task-regions | alcbev > nonalcbev | parsopercularis | L | 3.709 | 110686 | 543.82 | -46.6 | 22.6 | 7.6 | 0.03 | 0.02617 | 0.03381 | 1090 |
| ALCw | task-regions | alcbev > nonalcbev | inferiorparietal | L | 3.231 | 29327 | 517.43 | -44.1 | -69.1 | 20.8 | 0.04054 | 0.03616 | 0.04491 | 881 |
| ALCw | task-regions | alcbev > nonalcbev | inferiorparietal | R | 2.89 | 158246 | 972.39 | 42.5 | -64.4 | 7.1 | 0.0003 | 0 | 0.0006 | 1681 |
| NCw | task-regions | alcbev > nonalcbev | superiorparietal | L | 2.749 | 100056 | 696.49 | -21.3 | -56.6 | 62.3 | 0.0036 | 0.0024 | 0.00509 | 1504 |
| ALCm | task-regions | alcbev > scrambled | lateraloccipital | L | 6.82 | 112623 | 9254.88 | -23.5 | -93.1 | 1.2 | 0.0003 | 0 | 0.0006 | 14918 |
| ALCm | task-regions | alcbev > scrambled | precentral | L | 5.097 | 102385 | 1154.47 | -27.7 | -22.4 | 62.9 | 0.0003 | 0 | 0.0006 | 2780 |
| ALCm | task-regions | alcbev > scrambled | bankssts | L | 3.981 | 86601 | 489.82 | -50.3 | -43.9 | -0.6 | 0.03146 | 0.02764 | 0.03528 | 1124 |
| ALCm | task-regions | alcbev > scrambled | lateraloccipital | R | 5.32 | 129176 | 5250.06 | 25.7 | -97.9 | -2 | 0.0003 | 0 | 0.0006 | 7456 |
| ALCm | task-regions | alcbev > scrambled | precentral | R | 2.656 | 72522 | 782.86 | 42.6 | -11.6 | 29.6 | 0.0009 | 0.0003 | 0.0015 | 1824 |
| ALCw | task-regions | alcbev > scrambled | fusiform | L | 6.095 | 34311 | 13105.37 | -29.1 | -78.2 | -9 | 0.0003 | 0 | 0.0006 | 20562 |
| ALCw | task-regions | alcbev > scrambled | isthmuscingulate | L | 4.555 | 57611 | 563.79 | -7.7 | -42.1 | 26.1 | 0.02587 | 0.02233 | 0.02941 | 1660 |
| ALCw | task-regions | alcbev > scrambled | parsopercularis | L | 4.416 | 20526 | 2644.35 | -49.9 | 21.3 | 8.8 | 0.0003 | 0 | 0.0006 | 4925 |
| ALCw | task-regions | alcbev > scrambled | superiorfrontal | L | 3.915 | 133846 | 522.69 | -6.6 | 17.8 | 61.3 | 0.03937 | 0.03498 | 0.04375 | 926 |
| ALCw | task-regions | alcbev > scrambled | lateraloccipital | R | 8.832 | 119142 | 12539.17 | 28.1 | -96.8 | -1.5 | 0.0003 | 0 | 0.0006 | 19287 |
| ALCw | task-regions | alcbev > scrambled | superiorfrontal | R | 3.963 | 47146 | 785.28 | 7.9 | 18.3 | 50.6 | 0.003 | 0.0018 | 0.00419 | 1569 |
| ALCw | task-regions | alcbev > scrambled | lateralorbitofrontal | R | 3.159 | 37696 | 1035.15 | 39.4 | 30.1 | -13 | 0.0003 | 0 | 0.0006 | 1916 |
| ALCw | task-regions | alcbev > scrambled | rostralmiddlefrontal | R | 2.655 | 37107 | 1604.06 | 40 | 25 | 34.3 | 0.0003 | 0 | 0.0006 | 2901 |
| NCm | task-regions | alcbev > scrambled | lateraloccipital | L | 6.805 | 122808 | 11030.59 | -15.2 | -95.6 | -12.9 | 0.0003 | 0 | 0.0006 | 17180 |
| NCm | task-regions | alcbev > scrambled | fusiform | R | 6.25 | 92502 | 10153.11 | 35.9 | -72.4 | -12.4 | 0.0003 | 0 | 0.0006 | 15436 |
| NCm | task-regions | alcbev > scrambled | precuneus | R | 2.429 | 98061 | 571.75 | 10.4 | -53.3 | 44.6 | 0.01017 | 0.00808 | 0.01255 | 1490 |
| NCw | task-regions | alcbev > scrambled | fusiform | L | 4.853 | 48274 | 2961.14 | -29.9 | -63.8 | -13.1 | 0.0003 | 0 | 0.0006 | 4221 |
| NCw | task-regions | alcbev > scrambled | inferiorparietal | L | 3.525 | 45896 | 469.12 | -43.9 | -64.9 | 9 | 0.02292 | 0.01967 | 0.02617 | 941 |
| NCw | task-regions | alcbev > scrambled | superiorparietal | L | 2.819 | 157385 | 433.04 | -24.2 | -63.1 | 49.2 | 0.04083 | 0.03645 | 0.0452 | 920 |
| NCw | task-regions | alcbev > scrambled | superiorparietal | L | 2.682 | 87111 | 609.56 | -25.6 | -80.9 | 12.8 | 0.0018 | 0.0009 | 0.0027 | 1021 |
| NCw | task-regions | alcbev > scrambled | lateraloccipital | R | 6.04 | 90488 | 1846.73 | 25.4 | -89.2 | -9.5 | 0.0003 | 0 | 0.0006 | 3154 |
| NCw | task-regions | alcbev > scrambled | lateraloccipital | R | 3.065 | 114637 | 624.55 | 44.2 | -71.3 | -8 | 0.0009 | 0.0003 | 0.0015 | 881 |
| NCw | task-regions | alcbev > scrambled | superiorparietal | R | 2.97 | 157814 | 450.45 | 31.1 | -73.7 | 17.1 | 0.02764 | 0.0241 | 0.03117 | 806 |
| ALCm | task-regions | nonalcbev > alcbev | pericalcarine | L | -3.202 | 120908 | 591.21 | -9.1 | -86.2 | -1 | 0.01225 | 0.00987 | 0.01463 | 837 |
| ALCm | task-regions | nonalcbev > alcbev | pericalcarine | R | -1.915 | 43525 | 692.03 | 17.9 | -69.6 | 10.6 | 0.003 | 0.0018 | 0.00419 | 1116 |
| NCm | task-regions | nonalcbev > alcbev | lateraloccipital | L | -2.977 | 38531 | 778.52 | -37.6 | -85.9 | -1.1 | 0.0006 | 0 | 0.0012 | 1036 |
| NCm | task-regions | nonalcbev > alcbev | insula | L | -2.786 | 96569 | 492.26 | -32.9 | 9.5 | 1.4 | 0.03352 | 0.0297 | 0.03762 | 1158 |
| NCm | task-regions | nonalcbev > alcbev | superiorfrontal | L | -2.596 | 67709 | 754.6 | -9.5 | 6.9 | 45.1 | 0.0006 | 0 | 0.0012 | 1532 |
| ALCm | task-regions | nonalcbev > scrambled | lateraloccipital | L | 6.96 | 148912 | 5460.13 | -22.1 | -90.6 | -11.2 | 0.0003 | 0 | 0.0006 | 7794 |
| ALCm | task-regions | nonalcbev > scrambled | lateraloccipital | R | 5.663 | 62800 | 4195.98 | 20.1 | -92.7 | -8.2 | 0.0003 | 0 | 0.0006 | 5903 |
| ALCm | task-regions | nonalcbev > scrambled | superiorfrontal | R | 3.639 | 70680 | 521.47 | 17.4 | -7.3 | 61.8 | 0.01671 | 0.01403 | 0.01967 | 1152 |
| ALCw | task-regions | nonalcbev > scrambled | lateraloccipital | L | 6.88 | 8571 | 8685.5 | -21.4 | -92.3 | -11 | 0.0003 | 0 | 0.0006 | 12702 |
| ALCw | task-regions | nonalcbev > scrambled | fusiform | R | 9.645 | 107788 | 9693.99 | 33.9 | -77 | -10.9 | 0.0003 | 0 | 0.0006 | 14150 |
| NCm | task-regions | nonalcbev > scrambled | lateraloccipital | L | 9.652 | 49589 | 11945.19 | -12 | -96.2 | -12.4 | 0.0003 | 0 | 0.0006 | 19538 |
| NCm | task-regions | nonalcbev > scrambled | lateraloccipital | R | 7.109 | 71808 | 9794.62 | 28.8 | -95.5 | -0.9 | 0.0003 | 0 | 0.0006 | 14894 |
| NCm | task-regions | nonalcbev > scrambled | caudalmiddlefrontal | R | 3.904 | 12394 | 494.97 | 38 | 3.2 | 38.1 | 0.03146 | 0.02764 | 0.03528 | 902 |
| NCm | task-regions | nonalcbev > scrambled | postcentral | R | 3.355 | 133589 | 467.15 | 38.7 | -31.1 | 47.5 | 0.04171 | 0.03733 | 0.04607 | 1096 |
| NCm | task-regions | nonalcbev > scrambled | parsopercularis | R | 2.974 | 124506 | 913.39 | 50.3 | 14.1 | 7.6 | 0.0003 | 0 | 0.0006 | 1651 |
| NCw | task-regions | nonalcbev > scrambled | inferiortemporal | L | 5.321 | 90682 | 2566.11 | -44.4 | -56.4 | -7.1 | 0.0003 | 0 | 0.0006 | 3820 |
| NCw | task-regions | nonalcbev > scrambled | superiorparietal | L | 3.983 | 157473 | 694.61 | -22.7 | -63.1 | 31.1 | 0.0009 | 0.0003 | 0.0015 | 1415 |
| NCw | task-regions | nonalcbev > scrambled | lateraloccipital | R | 6.176 | 161836 | 3067.24 | 26.1 | -88.5 | -10.5 | 0.0003 | 0 | 0.0006 | 5033 |
| NCw | task-regions | nonalcbev > scrambled | superiorparietal | R | 4.612 | 135644 | 954.67 | 26.3 | -77.1 | 19.7 | 0.0003 | 0 | 0.0006 | 1801 |
| NCw | task-regions | scrambled > nonalcbev | superiorfrontal | L | -3.307 | 117186 | 558.06 | -9.7 | 30.8 | 30.9 | 0.00479 | 0.0033 | 0.00629 | 1158 |
| NCw | task-regions | scrambled > nonalcbev | rostralmiddlefrontal | L | -2.669 | 99318 | 478.08 | -33.2 | 48.8 | 8.7 | 0.01314 | 0.01076 | 0.01582 | 699 |

Annotations (from the peak voxel location in the Desikan-Killiany atlas) are shown for each of the 99 clusters with significant distractor contrasts, calculated for each group separately. The clusters reported can be understood to span multiple functional regions [127](https://paperpile.com/c/jPzyAa/8GrPP). That is, they are not limited to a single region, as reported by the maximal vertex or voxel.Abbreviations: Hemi = hemisphere; Max = maximum -log10(*p*-value) for group comparison in the cluster; VtxMax = vertex number at the maximum; Size = surface area of cluster; MNIX, MNIY, and MNIZ = Montreal Neurological Institute 305-subject template coordinates X, Y, and Z for the maximum vertex; CWP = cluster-wise *p*-value further corrected for the three spaces of left cortex, right cortex, and volume; CWPLow and CWPHi = 90% confidence intervals for CWP; NVtxs = number of vertices in the cluster; alcbev = alcoholic beverages; nonalcbev = nonalcoholic beverages; L = left hemisphere; R = right hemisphere; bankssts = banks of the superior temporal sulcus.

#### **TABLE A5. Cortical cluster characteristics for significant Group-by-Gender interactions**

| Fixation Masking | Contrast | Annotation | Hemi | Max | VtxMax | Size (mm^2) | MNIX | MNIY | MNIZ | CWP | CWPLow | CWPHi | NVtxs |
| --- | --- | --- | --- | --- | --- | --- | --- | --- | --- | --- | --- | --- | --- |
| fixation-regions | alcbev > scrambled | superiorfrontal | L | -2.635 | 55177 | 313.89 | -7.9 | 46.2 | 22.9 | 0.01136 | 0.00897 | 0.01374 | 461 |
| fixation-regions | alcbev > scrambled | superiorfrontal | R | -3.304 | 146084 | 140.84 | 16.5 | 53.5 | 24.4 | 0.0021 | 0.0012 | 0.003 | 201 |
| fixation-regions | alcbev > scrambled | superiorfrontal | R | -2.453 | 134468 | 116.29 | 12 | 47.4 | 13.5 | 0.01017 | 0.00808 | 0.01255 | 184 |
| fixation-regions | alcbev > scrambled | precuneus | R | -1.444 | 122115 | 162.46 | 9.6 | -54.5 | 24.9 | 0.0003 | 0 | 0.0006 | 418 |
| fixation-regions | nonalcbev > scrambled | superiorfrontal | R | -3.422 | 59361 | 133.19 | 7.6 | 44.3 | 38.6 | 0.0003 | 0 | 0.0006 | 242 |
| fixation-regions | nonalcbev > scrambled | superiorfrontal | R | -3.143 | 8241 | 206.58 | 16 | 53.9 | 24.6 | 0.0003 | 0 | 0.0006 | 313 |
| fixation-regions | nonalcbev > scrambled | caudalmiddlefrontal | R | -2.747 | 29029 | 155.88 | 27.8 | 19.3 | 42.7 | 0.0003 | 0 | 0.0006 | 297 |
| task-regions | alcbev > scrambled | superiorparietal | L | -1.996 | 64642 | 333.28 | -22.2 | -84.9 | 23.6 | 0.00927 | 0.00718 | 0.01136 | 479 |
| task-regions | alcbev > scrambled | fusiform | R | -4.208 | 114347 | 1011.41 | 31.8 | -74.4 | -11.2 | 0.0003 | 0 | 0.0006 | 1562 |
| task-regions | alcbev > scrambled | superiorparietal | R | -2.983 | 157893 | 409.83 | 21.3 | -83.2 | 20.7 | 0.0012 | 0.0006 | 0.0021 | 627 |
| task-regions | alcbev > scrambled | lingual | R | -2.804 | 79452 | 375.68 | 6.9 | -68.3 | 2.4 | 0.0027 | 0.0015 | 0.00389 | 473 |
| task-regions | alcbev > scrambled | superiorparietal | R | -2.679 | 93240 | 261.8 | 24.9 | -60.1 | 48 | 0.03264 | 0.02882 | 0.03645 | 553 |
| task-regions | nonalcbev > scrambled | superiorparietal | L | -2.534 | 120369 | 478.5 | -17 | -88.7 | 20.5 | 0.0003 | 0 | 0.0006 | 709 |
| task-regions | nonalcbev > scrambled | lateraloccipital | R | -3.465 | 132542 | 658.32 | 29.9 | -85.6 | -12.5 | 0.0003 | 0 | 0.0006 | 985 |
| task-regions | nonalcbev > scrambled | superiorparietal | R | -2.61 | 130192 | 242.3 | 19.9 | -79.4 | 43 | 0.01908 | 0.01611 | 0.02204 | 404 |
| task-regions | nonalcbev > scrambled | lateraloccipital | R | -2.437 | 61711 | 238.46 | 21.3 | -87.7 | 18 | 0.02115 | 0.01789 | 0.0244 | 346 |
| task-regions | scrambled > nonalcbev | superiorfrontal | L | -3.795 | 4781 | 140.18 | -13.4 | 32.7 | 24.3 | 0.00718 | 0.00539 | 0.00897 | 238 |
| task-regions | scrambled > nonalcbev | rostralmiddlefrontal | L | -3.026 | 116230 | 173.7 | -31.1 | 48.1 | 7.1 | 0.0012 | 0.0006 | 0.0021 | 258 |
| task-regions | scrambled > nonalcbev | superiorfrontal | L | -1.97 | 153483 | 148 | -12 | 18.5 | 36.9 | 0.00449 | 0.003 | 0.00599 | 327 |
| task-regions | scrambled > nonalcbev | rostralmiddlefrontal | L | -1.861 | 36306 | 136.94 | -36.8 | 31.1 | 29.6 | 0.00897 | 0.00688 | 0.01106 | 200 |
| task-regions | nonalcbev > alcbev | superiorfrontal | L | 3.14 | 140803 | 102.82 | -8.9 | 30.4 | 32 | 0.04287 | 0.0385 | 0.04724 | 180 |
| task-regions | nonalcbev > alcbev | superiorfrontal | L | 2.283 | 110024 | 120.81 | -12.3 | 17.2 | 36.8 | 0.01403 | 0.01136 | 0.01671 | 290 |

Annotations (from the peak voxel location in the Desikan-Killiany atlas) are shown separately for each of the 22 clusters with significant Group-by-Gender interactions for distractor contrasts. The clusters reported can be understood to span multiple functional regions [127](https://paperpile.com/c/jPzyAa/8GrPP). That is, they are not limited to a single region, as reported by the maximal vertex or voxel.Abbreviations: Hemi = hemisphere; Max = maximum -log10(*p*-value) for group comparison in the cluster; VtxMax = vertex number at the maximum; Size = surface area of cluster; MNIX, MNIY, and MNIZ = Montreal Neurological Institute 305-subject template coordinates X, Y, and Z for the maximum vertex; CWP = cluster-wise *p*-value further corrected for the three spaces of left cortex, right cortex, and volume; CWPLow and CWPHi = 90% confidence intervals for CWP; NVtxs = number of vertices in the cluster; alcbev = alcoholic beverages; nonalcbev = nonalcoholic beverages; L = left hemisphere; R = right hemisphere. See Table 2 for a summary of the cluster information provided here.

#### **TABLE A6. Cortical cluster characteristics for significant comparisons between ALC and NC groups**

| Fixation Masking | Contrast | Annotation | Hemi | Max | VtxMax | Size (mm^2) | MNIX | MNIY | MNIZ | CWP | CWPLow | CWPHi | NVtxs |
| --- | --- | --- | --- | --- | --- | --- | --- | --- | --- | --- | --- | --- | --- |
| fixation-regions | alcbev > scrambled | inferiorparietal | L | 4.631 | 58681 | 489.84 | -50.5 | -55 | 23.8 | 0.0003 | 0 | 0.0006 | 1036 |
| fixation-regions | nonalcbev > scrambled | isthmuscingulate | L | 1.92 | 93859 | 136.3 | -14.5 | -53.6 | 7.6 | 0.00748 | 0.00569 | 0.00927 | 325 |
| task-regions | alcbev > nonalcbev | bankssts | L | 3.748 | 1233 | 327.69 | -50.5 | -38.3 | 2.9 | 0.0003 | 0 | 0.0006 | 773 |
| task-regions | alcbev > nonalcbev | lateralorbitofrontal | L | 3.411 | 67740 | 392.95 | -42.1 | 27.4 | -14.3 | 0.0003 | 0 | 0.0006 | 737 |
| task-regions | alcbev > nonalcbev | superiorparietal | L | 2.862 | 123629 | 420.39 | -30.7 | -50.7 | 49.5 | 0.0003 | 0 | 0.0006 | 950 |
| task-regions | alcbev > nonalcbev | superiortemporal | R | 2.818 | 12074 | 230.32 | 46.6 | -27.1 | -2.4 | 0.0006 | 0 | 0.0012 | 597 |
| task-regions | alcbev > nonalcbev | inferiorparietal | R | 2.766 | 31474 | 167.47 | 40 | -74.7 | 11.1 | 0.017 | 0.01403 | 0.01997 | 266 |
| task-regions | alcbev > nonalcbev | parsorbitalis | R | 2.692 | 27157 | 219.37 | 47.2 | 36.2 | -10.5 | 0.0009 | 0.0003 | 0.0015 | 298 |
| task-regions | alcbev > nonalcbev | lateraloccipital | R | 2.249 | 56055 | 346.42 | 42.2 | -72 | -5.8 | 0.0003 | 0 | 0.0006 | 461 |
| task-regions | alcbev > scrambled | superiortemporal | L | 4.221 | 86665 | 439.74 | -47.3 | -31.5 | -3.3 | 0.00449 | 0.003 | 0.00599 | 1029 |
| task-regions | alcbev > scrambled | superiorfrontal | L | 3.663 | 129715 | 522.55 | -7.2 | 24.4 | 46.7 | 0.0015 | 0.0006 | 0.0024 | 919 |
| task-regions | alcbev > scrambled | parsopercularis | L | 3.155 | 25042 | 876.27 | -45.5 | 17.6 | 20.3 | 0.0003 | 0 | 0.0006 | 1611 |
| task-regions | alcbev > scrambled | parsorbitalis | L | 2.208 | 10768 | 301.1 | -45.3 | 31.4 | -13.3 | 0.04578 | 0.04112 | 0.05043 | 621 |
| task-regions | alcbev > scrambled | superiorfrontal | R | 3.989 | 80231 | 427 | 11.6 | 20.7 | 57.1 | 0.0003 | 0 | 0.0006 | 844 |
| task-regions | alcbev > scrambled | caudalmiddlefrontal | R | 1.867 | 100338 | 259.44 | 38.9 | 7.5 | 55 | 0.03088 | 0.02705 | 0.03469 | 461 |

The activation levels for all contrasts were significantly greater for the ALC group than for the NC group. Annotations (from the peak voxel location in the Desikan-Killiany atlas) are shown separately for each of the 15 clusters with significant group comparisons for distractor contrasts. The clusters reported can be understood to span multiple functional regions [127](https://paperpile.com/c/jPzyAa/8GrPP). That is, they are not limited to a single region, as reported by the maximal vertex or voxel.Abbreviations: Hemi = hemisphere; Max = maximum -log10(*p*-value) for group comparison in the cluster; VtxMax = vertex number at the maximum; Size = surface area of cluster; MNIX, MNIY, and MNIZ = Montreal Neurological Institute 305-subject template coordinates X, Y, and Z for the maximum vertex; CWP = cluster-wise *p*-value further corrected for the three spaces of left cortex, right cortex, and volume; CWPLow and CWPHi = 90% confidence intervals for CWP; NVtxs = number of vertices in the cluster; alcbev = alcoholic beverages; nonalcbev = nonalcoholic beverages; L = left hemisphere; R = right hemisphere; bankssts = banks of the superior temporal sulcus.

#### **TABLE A7. Cortical cluster characteristics for significant Group-by-Gender interactions using permutation testing**

| Fixation Masking | Contrast | Annotation | Hemi | Max | VtxMax | Size (mm^2) | MNIX | MNIY | MNIZ | CWP | CWPLow | CWPHi | NVtxs |
| --- | --- | --- | --- | --- | --- | --- | --- | --- | --- | --- | --- | --- | --- |
| fixation-regions | alc > scram | temporalpole | R | 3.359 | 136614 | 10.23 | 33.2 | 8.8 | -32.9 | 0.04957 | 0.04567 | 0.05347 | 16 |
| task-regions | nonalc > alc | caudalanteriorcingulate | L | 3.518 | 83464 | 10.64 | -4.8 | 16.8 | 27.1 | 0.02563 | 0.02287 | 0.02859 | 24 |
| task-regions | nonalc > alc | superiorfrontal | L | 3.14 | 140803 | 8.84 | -8.9 | 30.4 | 32 | 0.03037 | 0.02721 | 0.03351 | 13 |

This table corresponds to Table A5, but uses strict permutation testing. Annotations (from the peak voxel location in the Desikan-Killiany atlas) are shown separately for each of the 3 clusters with significant Group-by-Gender interactions for distractor contrasts. The clusters reported can be understood to span multiple functional regions [127](https://paperpile.com/c/jPzyAa/8GrPP). That is, they are not limited to a single region, as reported by the maximal vertex or voxel.Abbreviations: Hemi = hemisphere; Max = maximum -log10(*p*-value) for group comparison in the cluster; VtxMax = vertex number at the maximum; Size = surface area of cluster; MNIX, MNIY, and MNIZ = Montreal Neurological Institute 305-subject template coordinates X, Y, and Z for the maximum vertex; CWP = cluster-wise *p*-value further corrected for the three spaces of left cortex, right cortex, and volume; CWPLow and CWPHi = 90% confidence intervals for CWP; NVtxs = number of vertices in the cluster; alcbev = alcoholic beverages; nonalcbev = nonalcoholic beverages; L = left hemisphere; R = right hemisphere. See Table 2 for a summary of the cluster information provided here.

#### **TABLE A8. Cortical cluster characteristics for significant comparisons between ALC and NC groups using permutation testing**

| Fixation Masking | Contrast | Annotation | Hemi | Max | VtxMax | Size (mm^2) | MNIX | MNIY | MNIZ | CWP | CWPLow | CWPHi | NVtxs |
| --- | --- | --- | --- | --- | --- | --- | --- | --- | --- | --- | --- | --- | --- |
| fixation-regions | alc > scram | inferiorparietal | L | 4.631 | 58681 | 41.53 | -50.5 | -55 | 23.8 | 0.02465 | 0.02188 | 0.02741 | 95 |
| task-regions | alc > nonalc | bankssts | L | 3.748 | 1233 | 29.98 | -50.5 | -38.3 | 2.9 | 0.04097 | 0.03744 | 0.04449 | 72 |
| task-regions | alc > scram | superiorfrontal | R | 3.936 | 63929 | 62.97 | 7.8 | 11 | 60.3 | 0.02168 | 0.01911 | 0.02425 | 122 |

This table corresponds to Table A6, but uses strict permutation testing. The activation levels for all contrasts were significantly greater for the ALC group than for the NC group. Annotations (from the peak voxel location in the Desikan-Killiany atlas) are shown separately for each of the 3 clusters with significant group comparisons for distractor contrasts. The clusters reported can be understood to span multiple functional regions [127](https://paperpile.com/c/jPzyAa/8GrPP). That is, they are not limited to a single region, as reported by the maximal vertex or voxel.Abbreviations: Hemi = hemisphere; Max = maximum -log10(*p*-value) for group comparison in the cluster; VtxMax = vertex number at the maximum; Size = surface area of cluster; MNIX, MNIY, and MNIZ = Montreal Neurological Institute 305-subject template coordinates X, Y, and Z for the maximum vertex; CWP = cluster-wise *p*-value further corrected for the three spaces of left cortex, right cortex, and volume; CWPLow and CWPHi = 90% confidence intervals for CWP; NVtxs = number of vertices in the cluster; alcbev = alcoholic beverages; nonalcbev = nonalcoholic beverages; L = left hemisphere; R = right hemisphere; bankssts = banks of the superior temporal sulcus.
